# Supplementary material for: Identification of Pathways in Liver Repair Potentially Targeted by Secretory Proteins from Human Mesenchymal Stem Cells
Source: PubMed Central journal article supplement (PMC4964475; doi:10.3390/ijms17071099), 2016-07-09
Supplement: ijms-17-01099-s001.pdf [file ijms-17-01099-s001.pdf]

## Supplementary Materials: Identification of Pathways in Liver Repair Potentially Targeted by Secretory Proteins from Human Mesenchymal Stem Cells

Sandra Winkler, Madlen Hempel, Sandra Brückner, Hans-Michael Tautenhahn, Roland Kaufmann and Bruno Christ

**Table S1.** Arbitrary abundance of proteins secreted by undifferentiated human bone marrow-derived mesenchymal stem cells (hbmMSC). *Italic script* indicates overlapping proteins in the same category (low, medium or high abundance) as in human subcutaneous adipose tissue-derived stem cells (cf. Table S2).

| <b>hbmMSC, Undifferentiated Protein Abundance</b> |                  |                         |
|---------------------------------------------------|------------------|-------------------------|
| <b>+ Low</b>                                      | <b>++ Medium</b> | <b>+++ High</b>         |
| Angiopoetin-2                                     |                  |                         |
| CD14                                              |                  |                         |
| <i>FGF basic</i>                                  |                  |                         |
| FGF-7                                             |                  |                         |
| HGF                                               | Angiopoetin-1    | Angiogenin              |
| <i>IL-2</i>                                       | Cystatin C       | Chitinase 3-like 1      |
| IL-4                                              | Dkk-1            | Complement factor D     |
| IL-6                                              | EMMPRIN          | IGFBP-3                 |
| IL-10                                             | ENA-78           | <i>IL-17A</i>           |
| <i>IL-11</i>                                      | Endoglin         | <i>MCP-1</i>            |
| IP-10                                             | FGF-19           | MIF                     |
| Leptin                                            | GDF-15           | PDGF-AA                 |
| M-CSF                                             | IGFBP-2          | <i>Pentraxin-3</i>      |
| RAGE                                              | IL-22            | <i>Serpin E1</i>        |
| <i>RANTES</i>                                     | $\mu$ PAR        | <i>Thrombospondin-1</i> |
| SDF-1 $\alpha$                                    |                  |                         |
| VEGF                                              |                  |                         |
| <i>Vitamin D BP</i>                               |                  |                         |

**Table S2.** Arbitrary abundance of proteins secreted by undifferentiated human subcutaneous adipose tissue-derived mesenchymal stem cells (hsubMSC). Italic script indicates overlapping proteins in the same category (low, medium or high abundance) as in human bone marrow-derived stem cells (cf. Table S1).

| <b>hsubMSC, Undifferentiated Protein Abundance</b> |                  |                         |
|----------------------------------------------------|------------------|-------------------------|
| <b>+ Low</b>                                       | <b>++ Medium</b> | <b>+++ High</b>         |
| Angiogenin                                         |                  |                         |
| Complement factor D                                |                  |                         |
| CRP                                                |                  |                         |
| EGF                                                |                  |                         |
| <i>FGF basic</i>                                   |                  |                         |
| FGF-19                                             |                  |                         |
| GM-CSF                                             |                  |                         |
| Gro- $\alpha$                                      |                  | Dkk-1                   |
| ICAM-1                                             |                  | ENA-78                  |
| IGFBP-3                                            |                  | IL-8                    |
| IL-1 $\beta$                                       |                  | <i>IL-17A</i>           |
| <i>IL-2</i>                                        | IL-6             | <i>MCP-1</i>            |
| <i>IL-11</i>                                       |                  | <i>Pentraxin-3</i>      |
| IL-12p70                                           |                  | <i>Serpin E1</i>        |
| MIF                                                |                  | <i>Thrombospondin-1</i> |
| Osteopontin                                        |                  |                         |
| PDGF-AA                                            |                  |                         |
| <i>RANTES</i>                                      |                  |                         |
| RBP4                                               |                  |                         |
| Resistin                                           |                  |                         |
| $\mu$ PAR                                          |                  |                         |
| <i>Vitamin D BP</i>                                |                  |                         |

**Table S3.** Arbitrary abundance of proteins secreted by hbmMSC after 16 days of hepatocytic differentiation. Italic script indicates overlapping proteins in the same category (low, medium or high abundance) as in human subcutaneous adipose tissue-derived stem cells (cf. Table S4).

| <b>hbmMSC, Hepatocytic Differentiated Protein Abundance</b> |                  |                                |
|-------------------------------------------------------------|------------------|--------------------------------|
| <b>+ Low</b>                                                | <b>++ Medium</b> | <b>+++ High</b>                |
| Aggrecan                                                    |                  | <i>Angiogenin</i>              |
| <i>BAFF</i>                                                 |                  | Angiopoetin-1                  |
| BDNF                                                        |                  | <i>Chitinase 3-like 1</i>      |
| <i>Complement component</i>                                 | Angiopoetin-2    | <i>Complement factor D</i>     |
| <i>C5/C5s</i>                                               | CD14             | <i>Cystatin C</i>              |
| CD30                                                        | DPPIV            | <i>Dkk-1</i>                   |
| <i>CD40Ligand</i>                                           | FGF basic        | <i>EMMPRIN</i>                 |
| CRP                                                         | <i>FGF-7</i>     | <i>ENA-78</i>                  |
| Cripto-1                                                    | <i>IL-4</i>      | <i>Endoglin</i>                |
| Fas Ligand                                                  | IL-11            | <i>FGF-19</i>                  |
| <i>Flt-3 Ligand</i>                                         | <i>IL-22</i>     | <i>GDF-15</i>                  |
| <i>G-CSF</i>                                                | IP-10            | GM-CSF                         |
| ICAM-1                                                      | Vitamin D BP     | <i>Gro-<math>\alpha</math></i> |
| <i>IFN-<math>\gamma</math></i>                              |                  | <i>IGFBP-2</i>                 |
| <i>IL-1<math>\alpha</math></i>                              |                  | <i>IGFBP-3</i>                 |
| <i>IL-1<math>\beta</math></i>                               |                  | IL-6                           |
| <i>IL-1<math>\alpha</math> receptor</i>                     |                  | <i>IL-8</i>                    |

---

|                                              |                                 |
|----------------------------------------------|---------------------------------|
| IL-2                                         | <i>IL-17A</i>                   |
| IL-3                                         | <i>MCP-1</i>                    |
| <i>IL-10</i>                                 | <i>MCP-3</i>                    |
| IL-12p70                                     | <i>M-CSF</i>                    |
| IL-13                                        | <i>MIF</i>                      |
| IL-15                                        | <i>MIP-3<math>\alpha</math></i> |
| IL-16                                        | <i>Pentraxin-3</i>              |
| IL-18BP $\alpha$                             | <i>RANTES</i>                   |
| IL-19                                        | <i>Resistin</i>                 |
| IL-23                                        | <i>SDF-1<math>\alpha</math></i> |
| <i>IL-24</i>                                 | <i>Serpin E1</i>                |
| <i>IL-27</i>                                 | <i>Thrombospondin-1</i>         |
| IL-31                                        | <i>uPAR</i>                     |
| <i>IL-32<math>\alpha/\beta/\gamma</math></i> | <i>VEGF</i>                     |
| IL-33                                        |                                 |
| IL-34                                        |                                 |
| I-TAC                                        |                                 |
| <i>Kallikrein-3</i>                          |                                 |
| Leptin                                       |                                 |
| LIF                                          |                                 |
| Lipocalin-2                                  |                                 |
| <i>MIG</i>                                   |                                 |
| MIP-1 $\alpha$ /MIP-1 $\beta$                |                                 |
| MIP-3 $\beta$                                |                                 |
| MMP-9                                        |                                 |
| Osteopontin                                  |                                 |
| <i>PDGF-AA</i>                               |                                 |
| <i>PF4</i>                                   |                                 |
| <i>RAGE</i>                                  |                                 |
| <i>RBP4</i>                                  |                                 |
| <i>Relaxin-2</i>                             |                                 |
| SHBG                                         |                                 |
| ST2                                          |                                 |
| TARC                                         |                                 |
| <i>TFF3</i>                                  |                                 |
| <i>TfR</i>                                   |                                 |
| TGF- $\alpha$                                |                                 |
| TNF- $\alpha$                                |                                 |

---

**Table S4.** Arbitrary abundance of proteins secreted by hsubMSC after 16 days of hepatocytic differentiation. Italic script indicates overlapping proteins in the same category (low, medium or high abundance) as in human bone marrow-derived stem cells (cf. Table S3).

| <b>hsubMSC, Hepatocytic Differentiated Protein Abundance</b> |                  |                            |
|--------------------------------------------------------------|------------------|----------------------------|
| <b>+ Low</b>                                                 | <b>++ Medium</b> | <b>+++ High</b>            |
| Angiopoetin-1                                                |                  |                            |
| Angiopoetin-2                                                |                  |                            |
| <i>BAFF</i>                                                  |                  |                            |
| <i>Complement component</i>                                  |                  |                            |
| <i>C5/C5a</i>                                                |                  |                            |
| CD14                                                         |                  |                            |
| <i>CD40 Ligand</i>                                           |                  |                            |
| <i>CRP</i>                                                   |                  | <i>Angiogenin</i>          |
| FGF basic                                                    |                  | <i>Chitinase 3-like 1</i>  |
| <i>Flt-3 Ligand</i>                                          |                  | <i>Complement factor D</i> |
| G-CSF                                                        |                  | <i>Cystatin C</i>          |
| GM-CSF                                                       |                  | <i>Dkk-1</i>               |
| <i>IFN-γ</i>                                                 |                  | DPPIV                      |
| <i>IL-1α</i>                                                 |                  | EMMPRIN                    |
| <i>IL-1β</i>                                                 |                  | ENA-78                     |
| <i>IL-1α receptor</i>                                        |                  | <i>Endoglin</i>            |
| <i>IL-10</i>                                                 | BDNF             | <i>FGF-19</i>              |
| IL-11                                                        | <i>FGF-7</i>     | <i>GDF-15</i>              |
| <i>IL-24</i>                                                 | <i>IL-4</i>      | <i>Gro-α</i>               |
| <i>IL-27</i>                                                 | IL-6             | <i>IGFBP-2</i>             |
| <i>IL-32</i>                                                 | <i>IL-22</i>     | <i>IGFBP-3</i>             |
| <i>α/β/γ</i>                                                 | MIP-3α           | <i>IL-8</i>                |
| IP-10                                                        | SHBG             | <i>IL-17A</i>              |
| <i>Kallikrein-3</i>                                          | ST2              | Leptin                     |
| MCP-3                                                        |                  | <i>MCP-1</i>               |
| M-CSF                                                        |                  | MIF                        |
| <i>MIG</i>                                                   |                  | <i>Pentraxin-3</i>         |
| MMP-9                                                        |                  | <i>SDF-1α</i>              |
| <i>PDGF-AA</i>                                               |                  | <i>Serpin E1</i>           |
| <i>PF4</i>                                                   |                  | <i>Thrombospondin-1</i>    |
| RAGE                                                         |                  | <i>uPAR</i>                |
| RANTES                                                       |                  | VEGF                       |
| <i>RBP4</i>                                                  |                  |                            |
| <i>Relaxin-2</i>                                             |                  |                            |
| Resistin                                                     |                  |                            |
| TARC                                                         |                  |                            |
| <i>TFF3</i>                                                  |                  |                            |
| <i>TfR</i>                                                   |                  |                            |
| Vitamin D BP                                                 |                  |                            |

**Table S5.** Analytes, alternative names and Entrez Gene IDs of the Human XL Cytokine Array as listed in the appendix of the manufacturer's manual. The last column shows the numbers as applied for designation of radii in Figure 4.

| Protein                     | Alternative Names                     | Entrez Gene ID | Secretome Profile ID (Figure 4) |
|-----------------------------|---------------------------------------|----------------|---------------------------------|
| Adiponectin                 | Acrp30                                | 9370           | 1                               |
| Aggrecan                    | Aggrecan1                             | 176            | 2                               |
| Angiogenin                  | ---                                   | 283            | 3                               |
| Angiopoietin-1              | Ang-1, ANGPT1                         | 284            | 4                               |
| Angiopoietin-2              | Ang-2, ANGPT2                         | 285            | 5                               |
| BAFF                        | Blys, TNFSF13B                        | 10,673         | 6                               |
| BDNF                        | Brain-derived Neurotrophic Factor     | 627            | 7                               |
| Complement Component C5/C5a | C5/C5a                                | 727            | 8                               |
| CD 14                       | ---                                   | 929            | 9                               |
| CD 30                       | TNFRSF8                               | 943            | 10                              |
| CD 40 ligand                | CD40L, TNFSF5, CD154, TRAP            | 959            | 11                              |
| Chitinase 3-like 1          | CHI3L1, YKL-40                        | 1116           | 12                              |
| Complement Factor D         | Adipsin, CFD                          | 1675           | 13                              |
| CRP                         | C-Reactive Protein                    | 1401           | 14                              |
| Cripto-1                    | Teratocarcinoma-derived Growth Factor | 6997           | 15                              |
| Cystatin C                  | CST3, ARMD11                          | 1471           | 16                              |
| Dkk-1                       | Dickkopf-1                            | 22,943         | 17                              |
| DPPIV                       | CD26, DPP4, Dipeptidyl-peptidase IV   | 1803           | 18                              |
| EGF                         | Epidermal Growth Factor               | 1950           | 19                              |
| EMMPRIN                     | CD147, Basigin                        | 682            | 20                              |
| ENA-78                      | CXCL5                                 | 6374           | 21                              |
| Endoglin                    | CD105, ENG                            | 2022           | 22                              |
| Fas Ligand                  | TNFSF6, CD178, CD95L                  | 356            | 23                              |
| FGF basic                   | FGF-2                                 | 2247           | 24                              |
| FGF-7                       | KGF                                   | 2252           | 25                              |
| FGF-19                      | ---                                   | 9965           | 26                              |
| Flt-3 Ligand                | FLT3LG                                | 2323           | 27                              |
| G-CSF                       | CSF3                                  | 1440           | 28                              |
| GDF-15                      | MIC-1                                 | 9518           | 29                              |
| GM-CSF                      | CSF2                                  | 1437           | 30                              |
| GRO- $\alpha$               | CXCL1, MSGA- $\alpha$                 | 2919           | 31                              |
| Growth Hormone              | GH, Somatotropin                      | 2688           | 32                              |
| HGF                         | Scatter Factor, SF                    | 3082           | 33                              |
| ICAM-1                      | CD54                                  | 3383           | 34                              |
| IFN- $\gamma$               | IFNG                                  | 3458           | 35                              |
| IGFBP-2                     | ---                                   | 3485           | 36                              |
| IGFBP-3                     | ---                                   | 3486           | 37                              |
| IL-1 $\alpha$               | IL-1F1                                | 3552           | 38                              |
| IL-1 $\beta$                | IL-1F2                                | 3553           | 39                              |
| IL-1ra                      | IL-1F3                                | 3557           | 40                              |
| IL-2                        | ---                                   | 3558           | 41                              |
| IL-3                        | ---                                   | 3562           | 42                              |
| IL-4                        | ---                                   | 3565           | 43                              |
| IL-5                        | ---                                   | 3567           | 44                              |
| IL-6                        | ---                                   | 3569           | 45                              |
| IL-8                        | CXCL8                                 | 3576           | 46                              |
| IL-10                       | ---                                   | 3586           | 47                              |
| IL-11                       | ---                                   | 3589           | 48                              |
| IL-12p70                    | ---                                   | 3593           | 49                              |
| IL-13                       | ---                                   | 3596           | 50                              |
| IL-15                       | ---                                   | 3600           | 51                              |
| IL-16                       | ---                                   | 3603           | 52                              |
| IL-17A                      | IL-17, CTLA8                          | 3605           | 53                              |
| IL-18 BPa                   | ---                                   | 10,068         | 54                              |
| IL-19                       | ---                                   | 29,949         | 55                              |
| IL-22                       | IL-TIF                                | 50,616         | 56                              |
| IL-23                       | IL-23A, SGRF                          | 51,561         | 57                              |
| IL-24                       | C49A, FISP, MDA-7, MOB-5, ST16        | 3627           | 58                              |

Table S5. Cont.

| Protein                             | Alternative Names       | Entrez Gene ID | Secretome Profile ID (Figure 4) |
|-------------------------------------|-------------------------|----------------|---------------------------------|
| IL-27                               | ---                     | 246,778        | 59                              |
| IL-31                               | ---                     | 386,653        | 60                              |
| IL-32 $\alpha$ / $\beta$ / $\gamma$ | ---                     | 9235           | 61                              |
| IL-33                               | C9orf26, DVS27, NF-HEV  | 90,865         | 62                              |
| IL-34                               | C9orf77                 | 146,433        | 63                              |
| IP-10                               | CXCL10                  | 3627           | 64                              |
| I-TAC                               | CXCL11, SCYB9B          | 6373           | 65                              |
| Kallikrein 3                        | PSA, KLK3               | 354            | 66                              |
| Leptin                              | OB                      | 3952           | 67                              |
| LIF                                 | ---                     | 3967           | 68                              |
| Lipocalin-2                         | NGAL, LCN2, Siderocalin | 3934           | 69                              |
| MCP-1                               | CCL2, MCAF              | 6347           | 70                              |
| MCP-3                               | CCL7, MARC              | 6354           | 71                              |
| M-CSF                               | CSF1                    | 1435           | 72                              |
| MIF                                 | ---                     | 4282           | 73                              |
| MIG                                 | CXCL9                   | 4283           | 74                              |
| MIP-1 $\alpha$ /MIP-1 $\beta$       | CCL3/CCL4               | 6348/6351      | 75                              |
| MIP-3 $\alpha$                      | CCL20, Exodus-1, LARC   | 6364           | 76                              |
| MIP-3 $\beta$                       | CCL19, ELC              | 6363           | 77                              |
| MMP-9                               | CLG4B, Gelatinase B     | 4318           | 78                              |
| Myeloperoxidase                     | MPO, Lactoperoxidase    | 4353           | 79                              |
| Osteopontin                         | OPN                     | 6696           | 80                              |
| PDGF-AA                             | ---                     | 5154           | 81                              |
| PDGF-AB/BB                          | ---                     | 5154/5155      | 82                              |
| Pentraxin-3                         | PTX3, TSG-14            | 5806           | 83                              |
| PF4                                 | CXCL4                   | 5196           | 84                              |
| RAGE                                | ---                     | 177            | 85                              |
| RANTES                              | CCL5                    | 6352           | 86                              |
| RBP4                                | ---                     | 5950           | 87                              |
| Relaxin-2                           | RLN2, PLXH2             | 6019           | 88                              |
| Resistin                            | ADSF, FIZZ3, RETN       | 56,729         | 89                              |
| SDF-1 $\alpha$                      | CXCL12, PBSF            | 6387           | 90                              |
| Serpin E1                           | PAI-I, PAI-1, Nexin     | 5054           | 91                              |
| SHBG                                | ABP                     | 6462           | 92                              |
| ST2                                 | IL-1 R4, IL-1RL1, ST2L  | 9173           | 93                              |
| TARC                                | CCL17                   | 6361           | 94                              |
| TFF3                                | ITF, TFI                | 7033           | 95                              |
| TfR                                 | CD71, TFR1, TFRC, TRFR  | 7037           | 96                              |
| TGF- $\alpha$                       | TGFA                    | 7039           | 97                              |
| Thrombospondin-1                    | THBS1, Tsp-1            | 7057           | 98                              |
| TNF- $\alpha$                       | TNFSF1A                 | 7124           | 99                              |
| $\mu$ PAR                           | PLAUR                   | 5329           | 100                             |
| VEGF                                | BEGFA                   | 7422           | 101                             |
| Vitamin D BP                        | VDB, DBP, VDBP          | 2638           | 102                             |

**Table S6.** Overview of antibodies used for flow cytometry.

| <b>Antibody</b>                                                 | <b>Origin</b>       | <b>Label</b> | <b>Catalogue Number</b> | <b>Provider</b>                                               |
|-----------------------------------------------------------------|---------------------|--------------|-------------------------|---------------------------------------------------------------|
| IgG <sub>1</sub> /IgG <sub>1</sub> isotype<br>simultest control | mouse               |              | 349526                  | Becton Dickinson<br>Biosciences Systems,<br>San Jose, CA, USA |
| <b>Mesenchymal stem cell markers</b>                            |                     |              |                         |                                                               |
| CD13                                                            | Mouse<br>Anti-human | PE           | 347406                  | Becton Dickinson<br>Biosciences Systems,<br>San Jose, CA, USA |
| CD29                                                            | Mouse<br>Anti-human | PE           | 555443                  | Becton Dickinson<br>Pharmigen™,<br>San Jose, CA, USA          |
| CD44                                                            | Mouse<br>Anti-human | PE           | 555479                  | Becton Dickinson<br>Pharmigen™,<br>San Jose, CA, USA          |
| CD54                                                            | Mouse<br>Anti-human | PE           | 347977                  | Becton Dickinson<br>Biosciences Systems,<br>San Jose, CA, USA |
| CD71                                                            | Mouse<br>Anti-human | PE           | 555537                  | Becton Dickinson<br>Pharmigen™,<br>San Jose, CA, USA          |
| CD90                                                            | Mouse<br>Anti-human | FITC         | 555595                  | Becton Dickinson<br>Pharmigen™,<br>San Jose, CA, USA          |
| CD105                                                           | Mouse<br>Anti-human | PE           | 560839                  | Becton Dickinson<br>Pharmigen™,<br>San Jose, CA, USA          |
| CD166                                                           | Mouse<br>Anti-human | PE           | 559263                  | Becton Dickinson<br>Pharmigen™,<br>San Jose, CA, USA          |
| <b>Hematopoietic stem cell markers</b>                          |                     |              |                         |                                                               |
| CD14                                                            | Mouse<br>Anti-human | FITC         | 345784                  | Becton Dickinson<br>Biosciences Systems,<br>San Jose, CA, USA |
| CD34                                                            | Mouse<br>Anti-human | FITC         | 555821                  | Becton Dickinson<br>Pharmigen™,<br>San Jose, CA, USA          |
| CD45                                                            | Mouse<br>Anti-human | FITC         | 345808                  | Becton Dickinson<br>Biosciences Systems,<br>San Jose, CA, USA |
